# Supplementary material for: In Vivo Analysis of the Dynamic Motion Stability Characteristics of Geese’s Neck
Source: MDPI journal article supplement (doi:10.3390/biomimetics7040160), 2022-10-12
Supplement: s1 [file s1]

CT scan parameters table

| Scan parameters | numeric |
|-----------------|---------|
| Effective       | 150mAs  |
| Voltage         | 80kv    |
| Slice           | 1.0mm   |
| Scan time       | 11.09s  |
| Rotation time   | 0.5s    |
| Delay           | 2s      |
